# Supplementary material
Source: Atypon-hosted journal article supplement (https://mail.jpma.org.pk/PdfDownloadsupplements/652)
Supplement: 652 [file 652]

One moment, please...


# Please wait while your request is being verified...
